# Supplementary material
Source: PubMed Central journal article supplement (PMC8386630)
Supplement: KAUP_A_1796292_SM6127.pdf [file KAUP_A_1796292_SM6127.pdf]

**A**

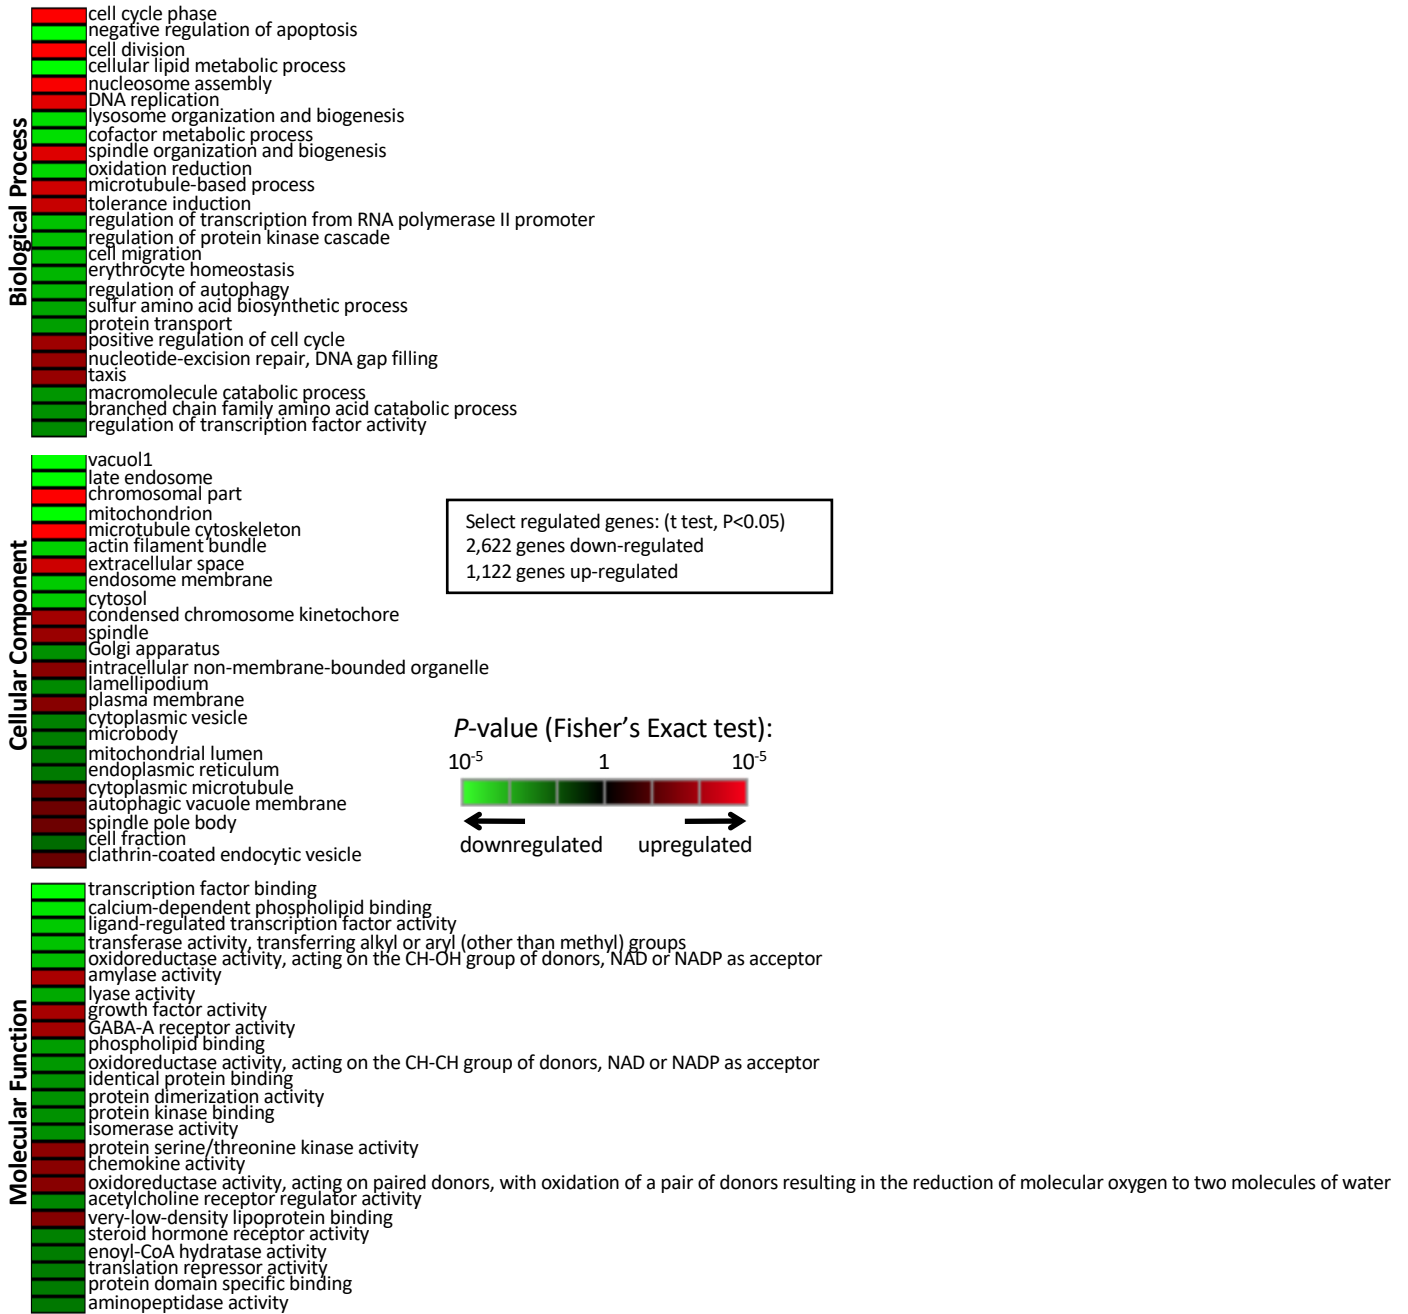

**B**

| Gene symbol | log2 expression change | Gene description                                           |
|-------------|------------------------|------------------------------------------------------------|
| ATP6V1C1    | -1.49                  | ATPase, H+ transporting, lysosomal 42kDa, V1 subunit C1    |
| ATP6V0C     | -0.18                  | ATPase, H+ transporting, lysosomal 16kDa, V0 subunit c     |
| ATP6V1H     | -1.16                  | ATPase, H+ transporting, lysosomal 50/57kDa, V1 subunit H  |
| ATP6V1E1    | -0.93                  | ATPase, H+ transporting, lysosomal 31kDa, V1 subunit E1    |
| ATP6V0D2    | -4.03                  | ATPase, H+ transporting, lysosomal 38kDa, V0 subunit d2    |
| ATP6V1G1    | -0.61                  | ATPase, H+ transporting, lysosomal 13kDa, V1 subunit G1    |
| ATP6V0E1    | -0.91                  | ATPase, H+ transporting, lysosomal 9kDa, V0 subunit e1     |
| ATP6V0D1    | -0.43                  | ATPase, H+ transporting, lysosomal 38kDa, V0 subunit d1    |
| ATP6V1B2    | -1.15                  | ATPase, H+ transporting, lysosomal 56/58kDa, V1 subunit B2 |

**A**

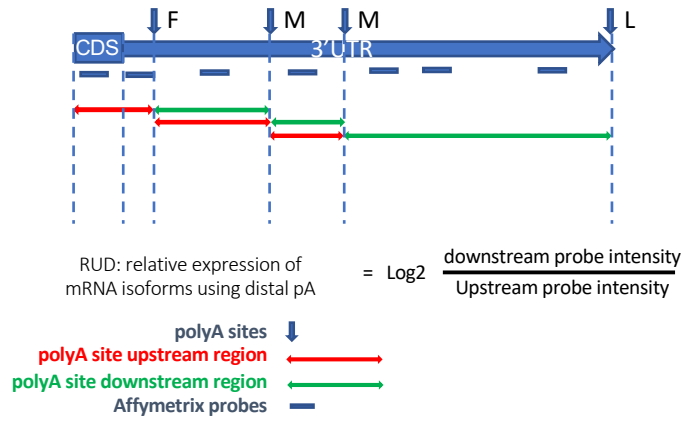

**B**

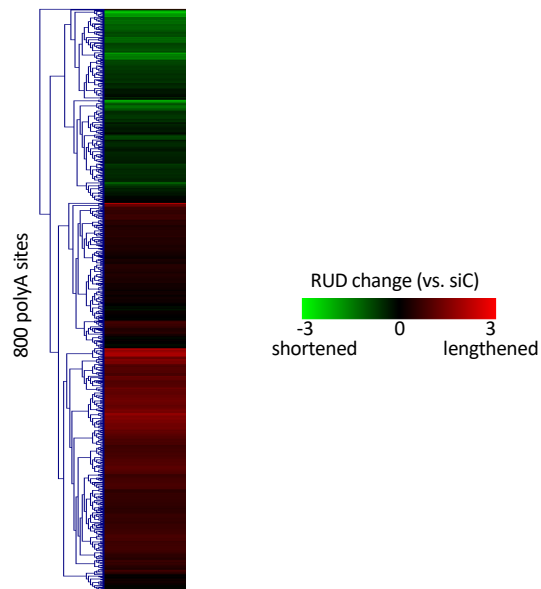

## A Definition of Alternative splicing (AS):

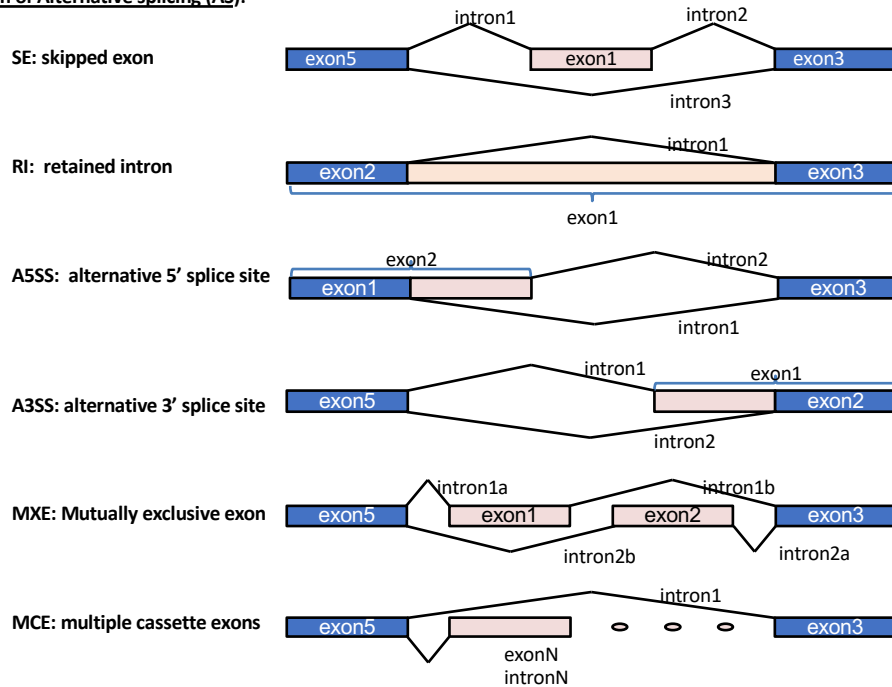

## B Splicing index calculating using microarray

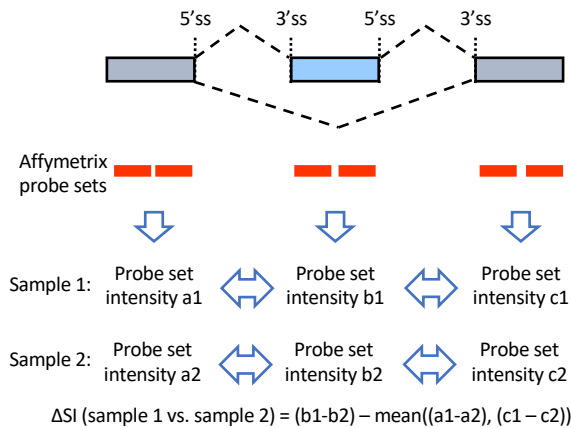

## C AS regulation

|    | se    | a5ss | a3ss | mxe | ri   | mce   |
|----|-------|------|------|-----|------|-------|
| ex | 869   | 103  | 134  | 14  | 78   | 788   |
| in | 1035  | 114  | 239  | 40  | 192  | 1443  |
| nc | 21981 | 2616 | 3670 | 642 | 2755 | 18130 |

### Comments:

alternative splicing regulation (t-test,  $P < 0.05$ ):

**ex**, exon more excluded

**in**, exon more included

**nc**, no change

gene expression regulation:

**dn**, gene down-regulated

**up**, gene up-regulated

**nc**, gene expression no significant change

## D

### Correlation between AS regulation and gene expression regulation

| Alternative splicing type | Alternative splicing regulation | Gene expression regulation |      |     | Total number of gene | Fisher's exact test P value | Spearman correlation       |
|---------------------------|---------------------------------|----------------------------|------|-----|----------------------|-----------------------------|----------------------------|
|                           |                                 | dn                         | nc   | up  |                      |                             |                            |
| se                        | ex                              | 129                        | 306  | 45  | 7172                 | 2.6E-04                     | p= 1.3e-29<br>rho= -0.133  |
|                           | in                              | 216                        | 337  | 29  |                      |                             |                            |
|                           | nc                              | 759                        | 5057 | 294 |                      |                             |                            |
| a5ss                      | ex                              | 18                         | 47   | 9   | 1732                 | 6.5E-03                     | p= 1.4e-20<br>rho= -0.221  |
|                           | in                              | 43                         | 29   | 3   |                      |                             |                            |
|                           | nc                              | 245                        | 1263 | 75  |                      |                             |                            |
| a3ss                      | ex                              | 21                         | 51   | 9   | 2218                 | 2.1E-02                     | p= 7.4e-16<br>rho= -0.17   |
|                           | in                              | 73                         | 74   | 9   |                      |                             |                            |
|                           | nc                              | 313                        | 1556 | 112 |                      |                             |                            |
| mxe                       | ex                              | 0                          | 12   | 1   | 493                  | 1.3E-01                     | p= 1.1e-20<br>rho= -0.403  |
|                           | in                              | 14                         | 13   | 1   |                      |                             |                            |
|                           | nc                              | 62                         | 374  | 16  |                      |                             |                            |
| ri                        | ex                              | 11                         | 36   | 10  | 1554                 | 6.8E-06                     | p= 1.1e-49<br>rho= -0.363  |
|                           | in                              | 71                         | 54   | 3   |                      |                             |                            |
|                           | nc                              | 226                        | 1070 | 73  |                      |                             |                            |
| mce                       | ex                              | 81                         | 265  | 59  | 6403                 | 1.3E-15                     | p= 8.9e-106<br>rho= -0.268 |
|                           | in                              | 255                        | 336  | 23  |                      |                             |                            |
|                           | nc                              | 670                        | 4471 | 243 |                      |                             |                            |

Note: for one gene only select most regulated AS events.

# Supplementary Figure S4

**A**

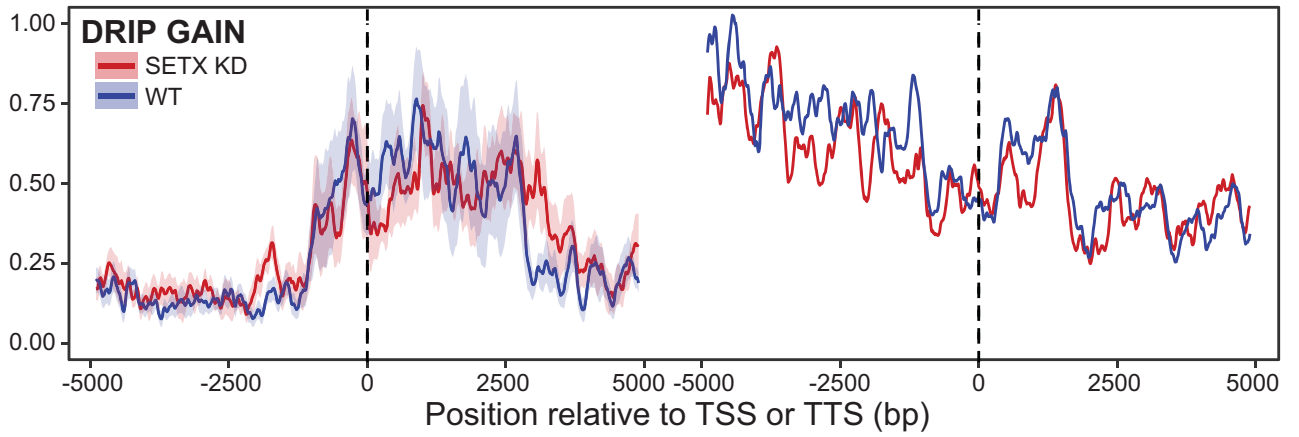

**B**

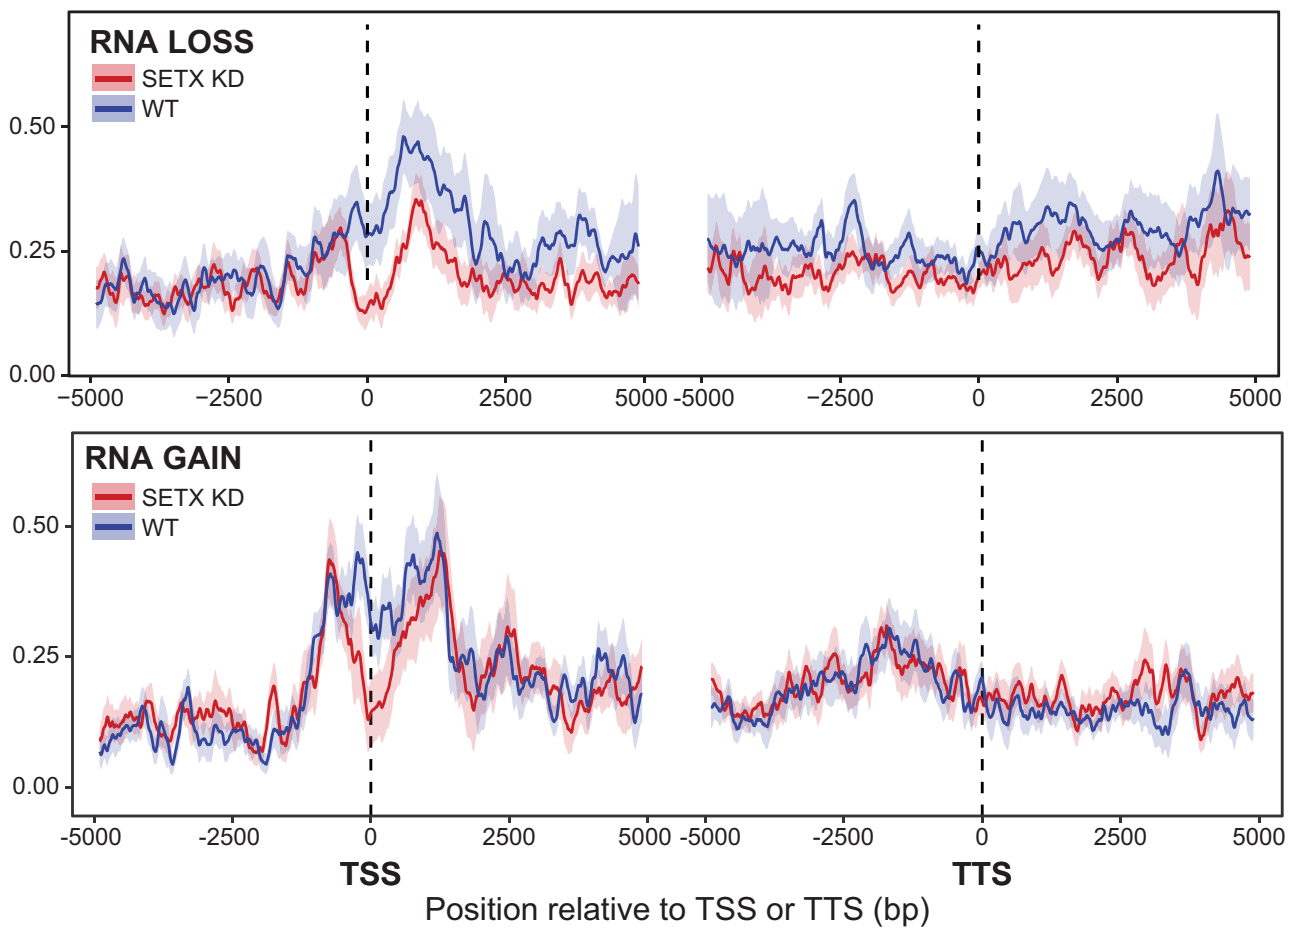

**A**

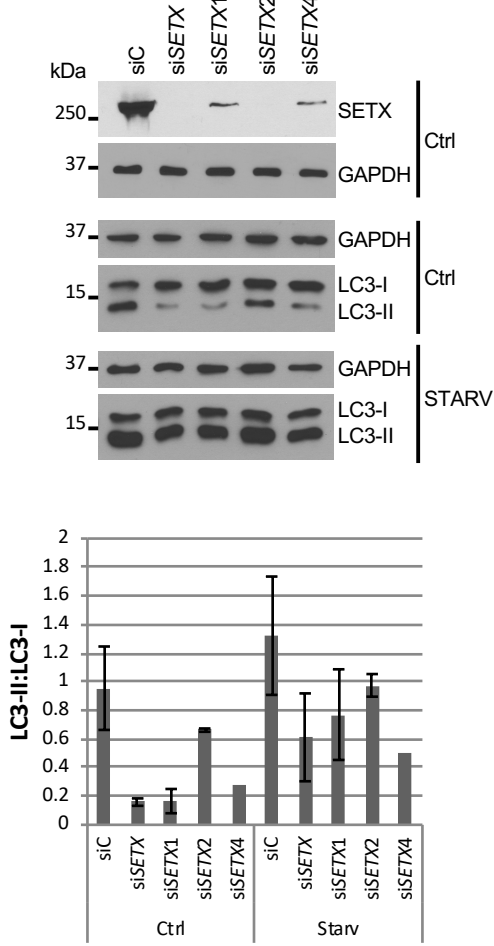

**B**

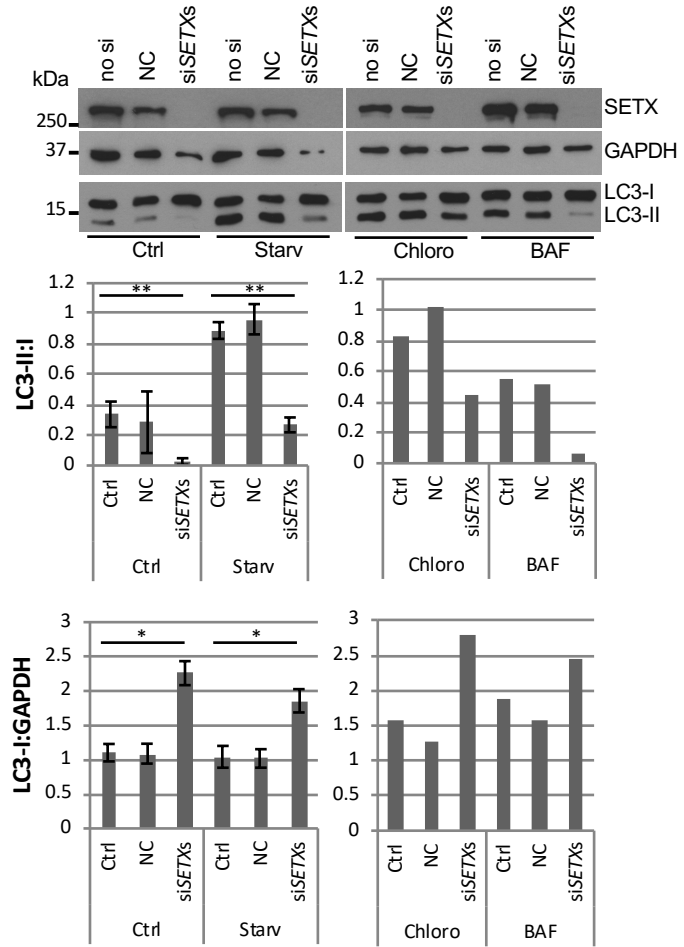

**C**

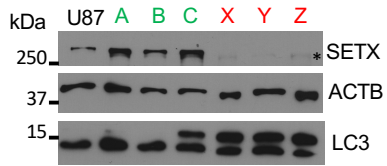

**D**

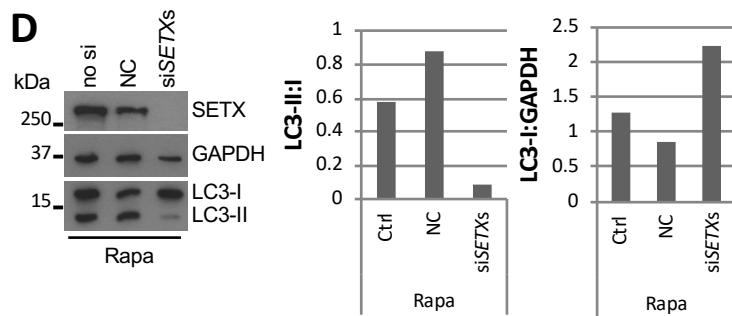

**E**

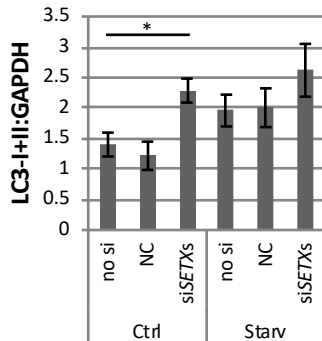

**F**

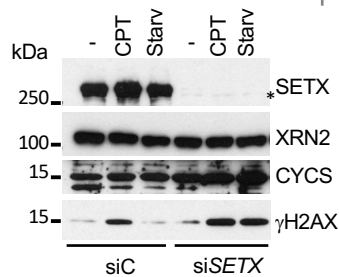

# Supplementary Figure S6

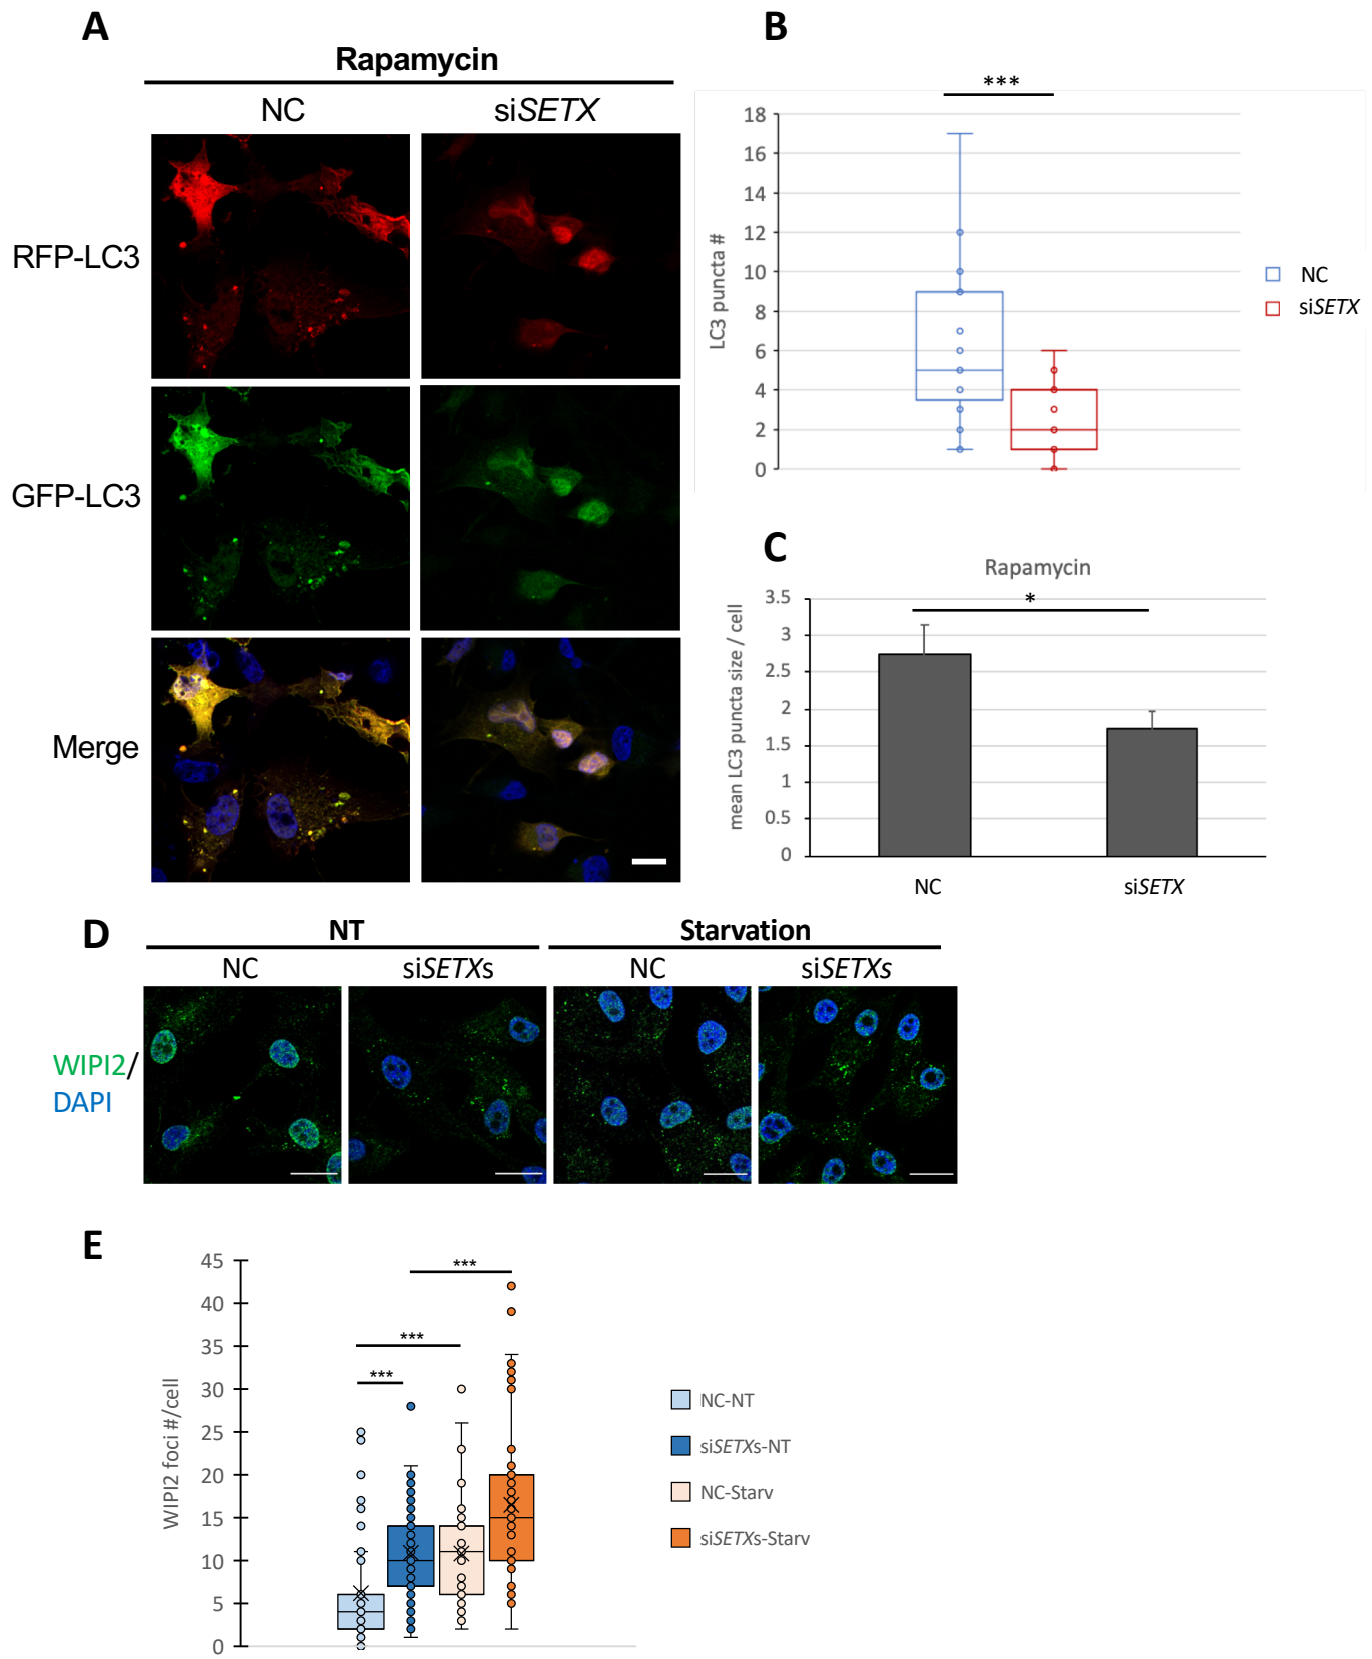

# Supplementary Figure S7

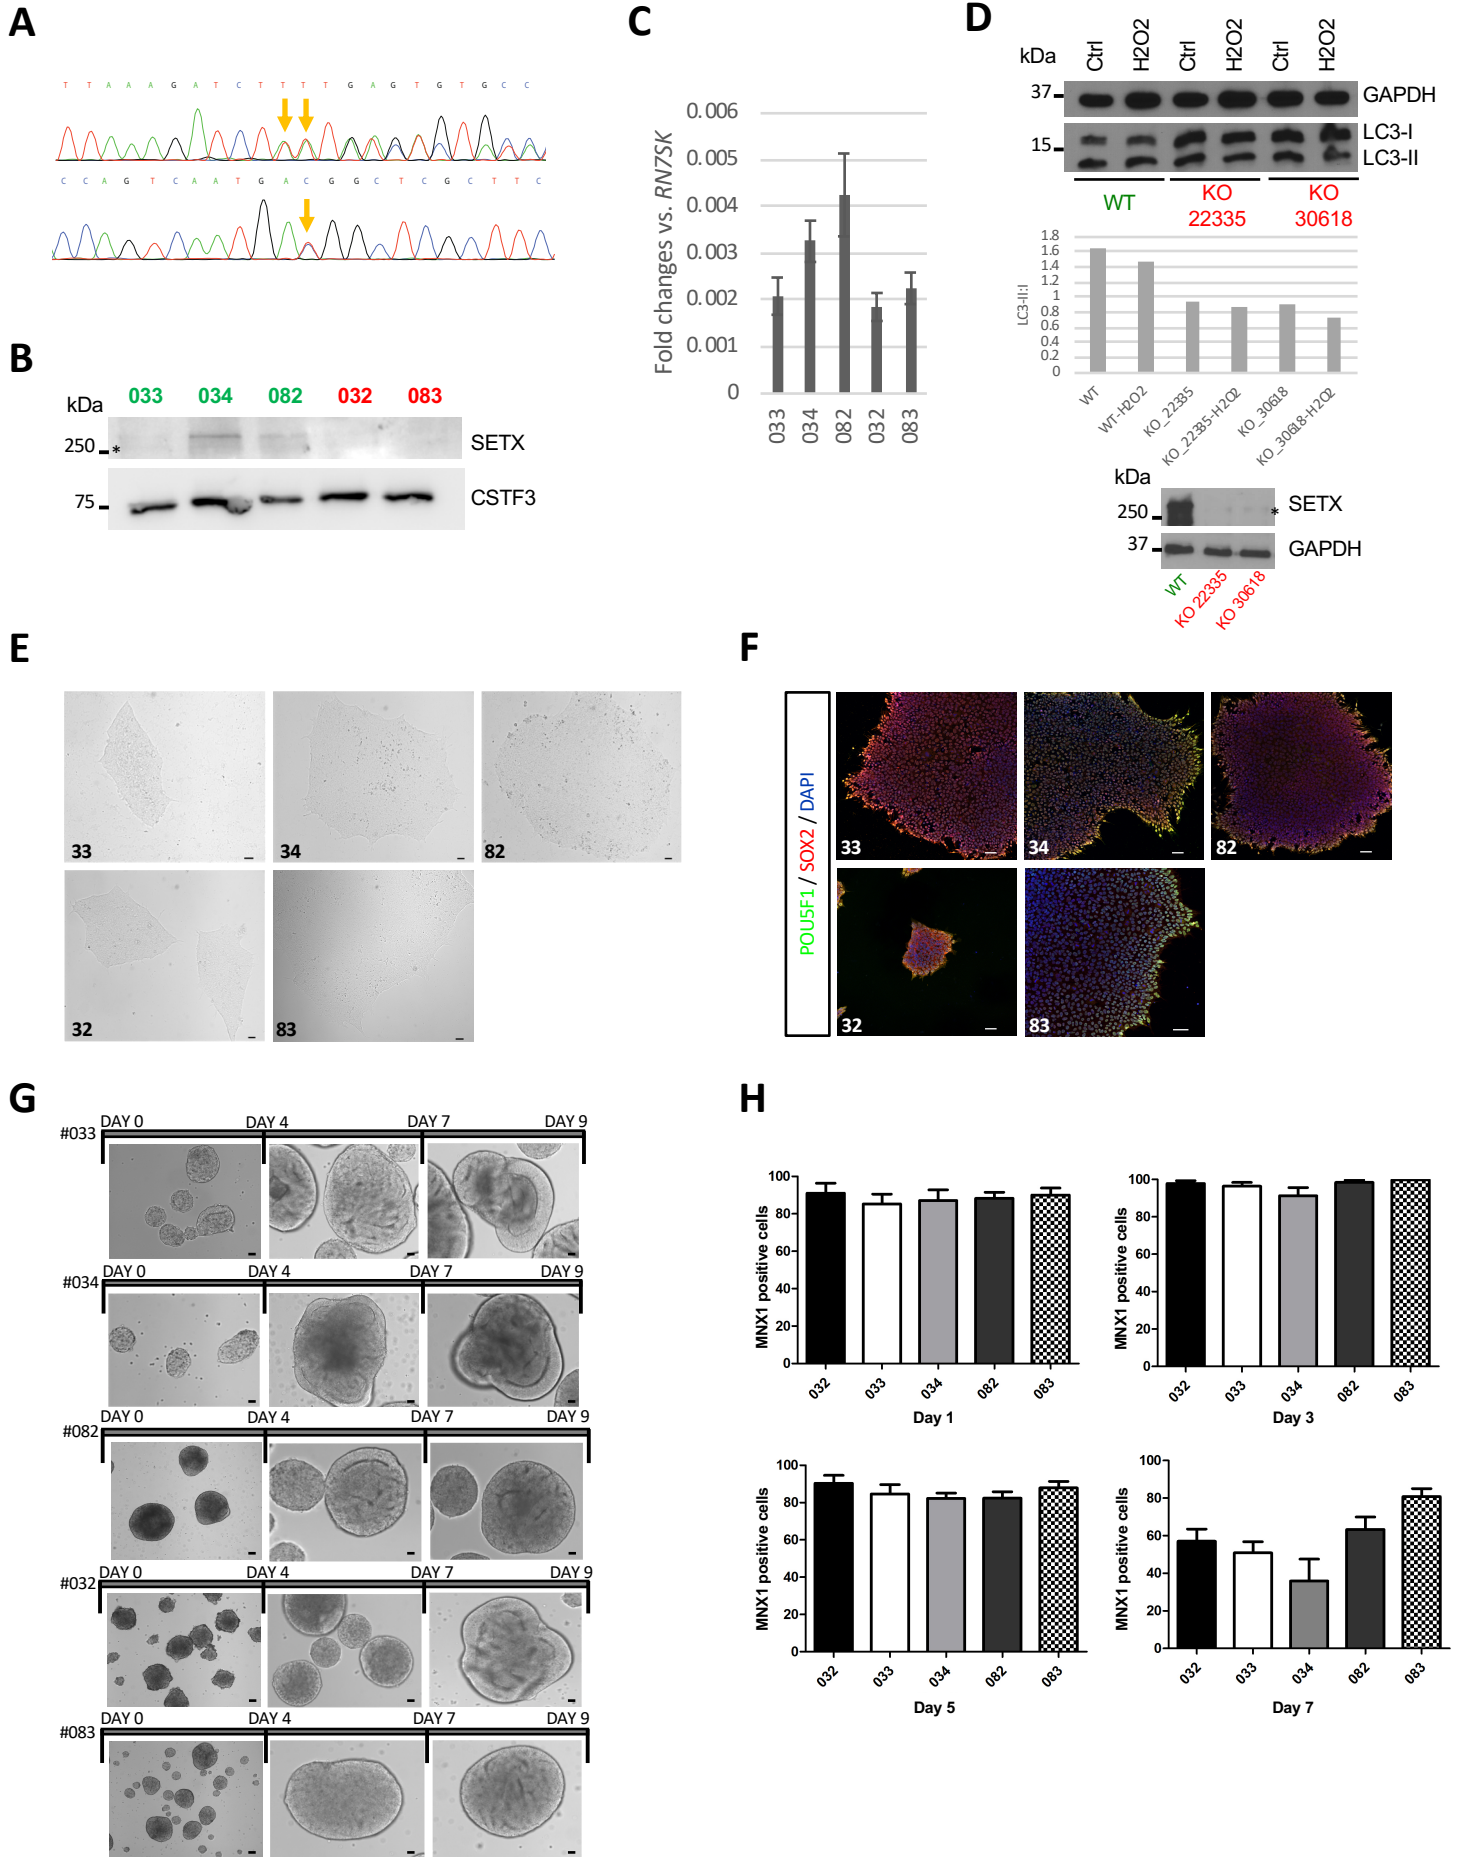

## SUPPLEMENTAL FIGURE LEGENDS

**Figure S1.** Gene regulation after SETX KD affects genes involved in various processes including autophagy and lysosomal degradation. **(A)** GO analysis of genes regulated by SETX KD obtained from the microarray data. **(B)** List of V-ATPase genes downregulated by SETX KD.

**Figure S2.** SETX KD impairs APA. **(A)** method for APA analysis from the microarray data. F, M and L denote the first, middle and last polyA sites in 3'-most exon. **(B)** Heatmap showing RUD changes in SETX KD.

**Figure S3.** AS analysis from the microarray data. **(A)** Definition of AS events analyzed in the study. In each AS type, two isoforms were compared, with the pink- and blue-colored regions indicating alternative and common regions, respectively. **(B)** Explanation of splicing index (SI) calculation. Probes mapped to different regions of exons were used to calculate a splicing index (SI). The difference of probe signal between alternative region (pink-colored in A) and common region is defined as SI, except for MXE, in which the difference between exon1 and exon2 is used. The  $\Delta$ SI is the difference of SI between two samples (e.g., knockdown vs. control, denoted as sample 1 vs. sample 2 here). All raw probe set signals are log 2 based. An increase of SI indicates an increased signal of the alternative region in sample 1. Here we call significant increase of SI "inclusion" (in) and decrease of SI "exclusion" (ex). **(C)** and **(D)** correlation between splicing event and gene expression after SETX KD in U87 cells.

**Figure S4.** SETX depletion does not increase R-loop signal. **(A)** Metagene plots showing DRIP-seq signal increase over promoters and terminal regions in SETX-depleted cells. The lines represent the average signal surrounded by the standard error (shaded) for



control and SETX-depleted cells, respectively. **(B)** Metagene plots showing DRIP-seq signal over promoter and terminal regions of genes showing loss of gene expression (RNA loss [top]) and gain of gene expression (RNA gain [bottom]) in SETX-depleted cells.

**Figure S5.** SETX regulates the autophagic flux. **(A)** U87 transfection with control (siC) and 4 different siRNAs targeting *SETX* at 20 nM for 72 h. Protein extracts were analyzed by WB in normal conditions (Ctrl) and after starvation for 24 h (STARV) in medium containing 0.1% FBS. Graph shows LC3-II:LC3-I quantification.  $n = 2$ , SD shown. **(B)** Steady-state levels of LC3 expression in U87 cells. Cells were cultured in DMEM with (Ctrl) or without FBS for 6 h (Starv), treated with chloroquine (Chloro; 20  $\mu$ M) or Bafilomycin (BAF; 100 nM) for 6 h after transfection without siRNA (no si), with a negative control siRNA (NC) and a pool of 4 siRNAs targeting *SETX* (si*SETX*s) at 2 nM each for 72 h. Cell extracts were analyzed by WB. The upper graph shows LC3-II:LC3-I quantification. The lower graph shows LC3-I ratio to GAPDH. For Ctrl and Starv,  $n = 4$ , SE shown. Significance was analyzed by a student's t-test, \* $p < 0.05$ , \*\* $p < 0.01$ . **(C)** Steady-state levels of SETX and LC3 in WT (green) and *SETX* KO (red) U87 CRISPR cells. ACTB is used as a loading control. \* indicates non-specific band. **(D)** WB as in B. Extracts were prepared after rapamycin treatment at 100 nM for 6 h. **(E)** Quantification of total LC3 levels after SETX KD (I + II) as shown in WB **Fig. S5B**.  $n = 3$ , SE shown. Significance was analyzed by a student's t-test, \* $p < 0.05$ . **(F)** Proteins extract and analysis of SETX, CYCS (cytochrome c) and  $\gamma$ H2AX levels after siC and si*SETX* transfection for 72 h in U87 cells after no treatment (-), CPT treatment and starvation for 6 h in medium without FBS (Starv). XRN2 is used as loading control. \* indicates non-specific band.

**Figure S6.** SETX KD compromises autophagosome and autolysosome formation. **(A)** mRFP-GFP-LC3 puncta formation assay in rapamycin-treated (10 nM for 6 h) U87 cells transfected with NC or siSETX for 48 h prior *mRFP-GFP-LC3* transfections for 24 h. Merge signal (yellow) indicate the formation of autophagosomes. Scale bar: 15  $\mu$ m. **(B)** Quantification of autophagosomes and autolysosomes number per cell in control and SETX KD cells. Total cells analyzed: n = 44; Unpaired t-test \*\*\*p < 0.001. **(C)** Quantification of mean LC3 puncta size per cell in control and SETX KD cells. Total number of 91 LC3 puncta from 20 cells were analyzed. Data is displayed in mean  $\pm$  s.e.m. Unpaired t-test \*p < 0.05. **(D)** U87 cells were transfected with a siRNA control (NC) or a pool of siRNAs (siSETXs) for 72 h. Cells were untreated (NT) or starved for 6 h and stained for endogenous WIPI2 (green). Scale bar: 15  $\mu$ m. **(E)** Quantification of WIPI2 foci per cell as shown in D. Significance was analyzed by a student's t-test, \*\*\*p < 0.001.

**Figure S7.** Characterization of control and AOA2 patients' fibroblasts and the corresponding iPSCs and EBs. **(A)** Chromatogram of sequencing covering *SETX* exons 10 (top) and 21 (bottom) of AOA2 patient #032 that carry new mutations. **(B)** SETX protein level in control (green) and AOA2 (red) fibroblasts. CSTF3 (cleavage stimulation factor subunit 3) is used as loading control. \* indicates non-specific band. **(C)** *SETX* mRNA quantification by RT-qPCR in control (033, 034, 082) and AOA2 fibroblasts (032 and 083), n = 10, SE shown. **(D)** Steady-state levels of LC3 in WT (green) and AOA2 (red) lymphoblastic cells in normal condition (Ctrl) and after H<sub>2</sub>O<sub>2</sub> treatment at 0.5 mM for 30 min. The graph shows LC3-II:LC3-I quantification and the lower WB shows SETX protein level in each cell line. \* indicates non-specific band. **(E)** Representative brightfield pictures of iPSCs colonies obtained from the 3 asymptomatic individuals (033, 034, 082) and 2 AOA2 patients (032 and 083) from the same family. All five iPSC cell lines presented a normal morphology, and they were also positive for specific stem cell markers. Scale bar:

50  $\mu\text{m}$ . **(F)** Characterization of the iPSC colonies with specific stem cell markers, POU5F1 (POU class 5 homeobox 1) in green, SOX2 (SRY-box transcription factor 2) in red and nuclear staining in blue (DAPI). Scale bar: 50  $\mu\text{m}$ . **(G)** Brightfield representative images of EBs during the differentiation process. Scale bar: 50  $\mu\text{m}$  (DAY 0 to DAY 4); 25  $\mu\text{m}$  (DAY 4 to DAY 9). **(H)** MNs count at day 1, 3, 5 and 7 after plating.
